# Supplementary material
Source: PubMed Central journal article supplement (PMC3010460)

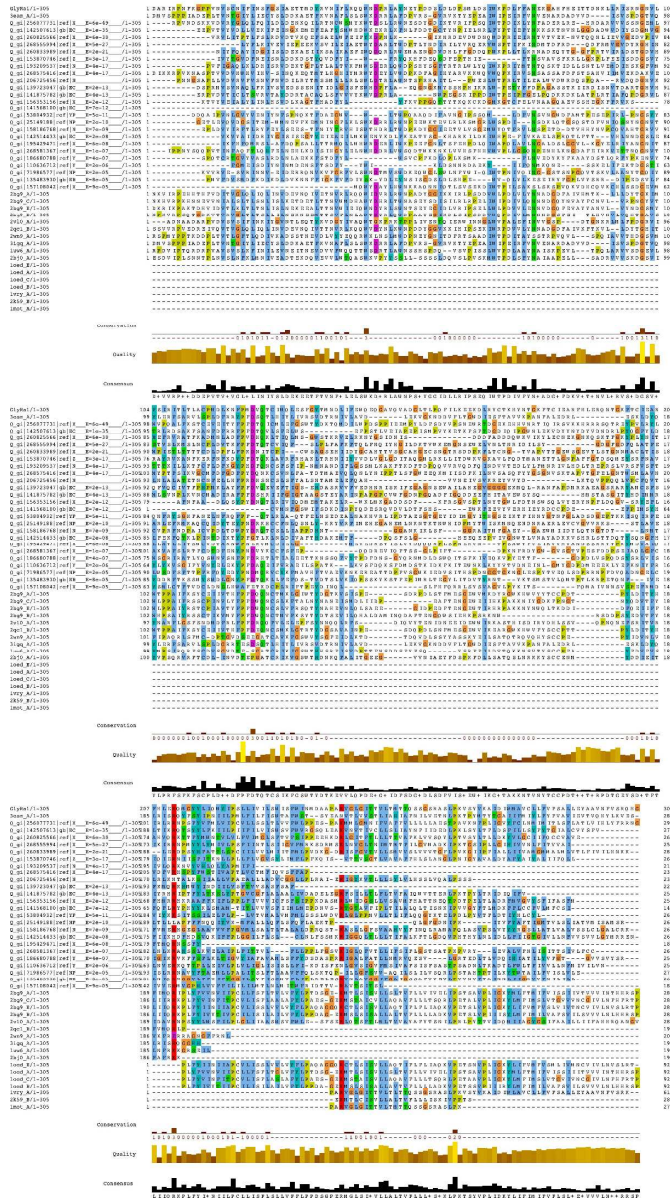

647x1160mm (96 x 96 DPI)

Supplement: NIHMS255583-supplement-1_si_001.pdf [file NIHMS255583-supplement-1_si_001.pdf]
